# Supplementary material for: Seawater-magma interactions sustained the high column during the 2021 phreatomagmatic eruption of Fukutoku-Oka-no-Ba
Source: Springer Nature journal article supplement (doi:10.1038/s43247-022-00594-4), 2022-11-01
Supplement: 43247_2022_594_MOESM2_ESM.pdf [file 43247_2022_594_MOESM2_ESM.pdf]

## Supplementary Information

### Seawater-magma interactions sustained the high column during the 2021 phreatomagmatic eruption of Fukutoku-Oka-no-Ba

Maeno, F.<sup>1\*</sup>, Kaneko, T.<sup>1</sup>, Ichihara, M.<sup>1</sup>, Suzuki, Y.J.<sup>1</sup>,  
Yasuda, A.<sup>1</sup>, Nishida, K.<sup>1</sup>, and Ohminato, T.<sup>1</sup>

1: Earthquake Research Institute, the University of Tokyo  
1-1-1 Yayoi, Bunkyo-ku, Tokyo 113-0032, Japan  
\* Corresponding author: fmaeno@eri.u-tokyo.ac.jp

#### Contents:

**Supplementary Figure 1** | Infrared photo of the 2021 FOB eruption.

**Supplementary Figure 2** | Photos of a new islet of FOB.

**Supplementary Table 1** | Physical conditions and virtual input parameters to Plumeria.

**Supplementary Figure 3** | The relation between the external mass fraction added to magma and the representative physical parameters at the vent.

**Supplementary Figure 4** | Atmospheric structure at the time of the 2021 FOB eruption.

**Supplementary Figure 5** | The relation between the total magma discharge rate and the representative physical parameters obtained by Plumeria.

**Supplementary Figure 6** | Pumice samples from the 2021 FOB eruption used for whole-rock major element analyses.

**Supplementary Note 1** | Plume modelling.

**Supplementary Data 1** | Whole-rock major and trace element compositions of the representative samples from the 2021 FOB eruption (Excel file).

**Supplementary Data 2** | Glass chemical compositions of groundmass glass and melt inclusions of the 2021 FOB products (Excel file).

## Phase 1: Relatively high-discharge period

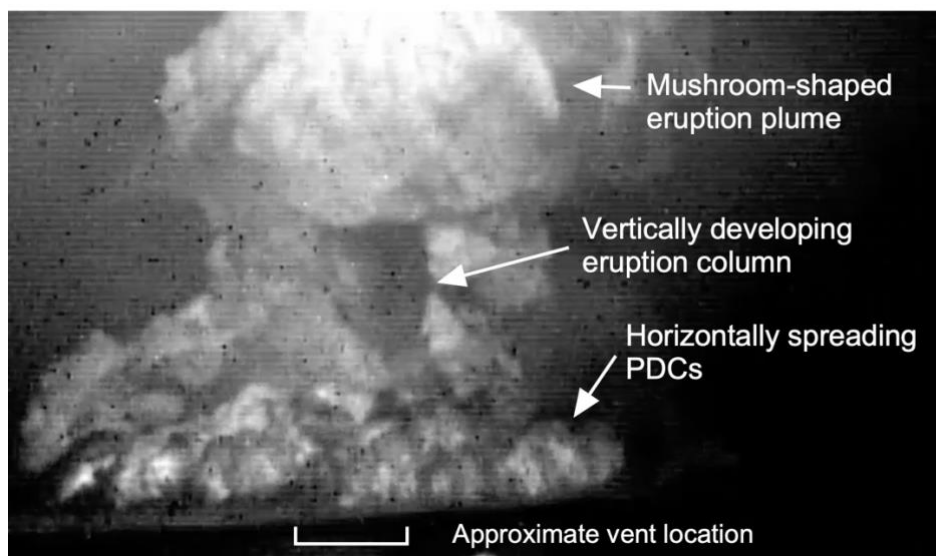

**Supplementary Figure 1 | Infrared photo of the 2021 FOB eruption.** The FOB eruption generated mushroom-shaped convective plumes and laterally spreading pyroclastic density currents during a relatively high-discharge period of Phase 1b. The image was taken at 15:00-15:30 JST on 13 August 2021, from 6,000 m above sea level and approximately 90 km north of the volcano by the Japan Coast Guard<sup>1</sup>.

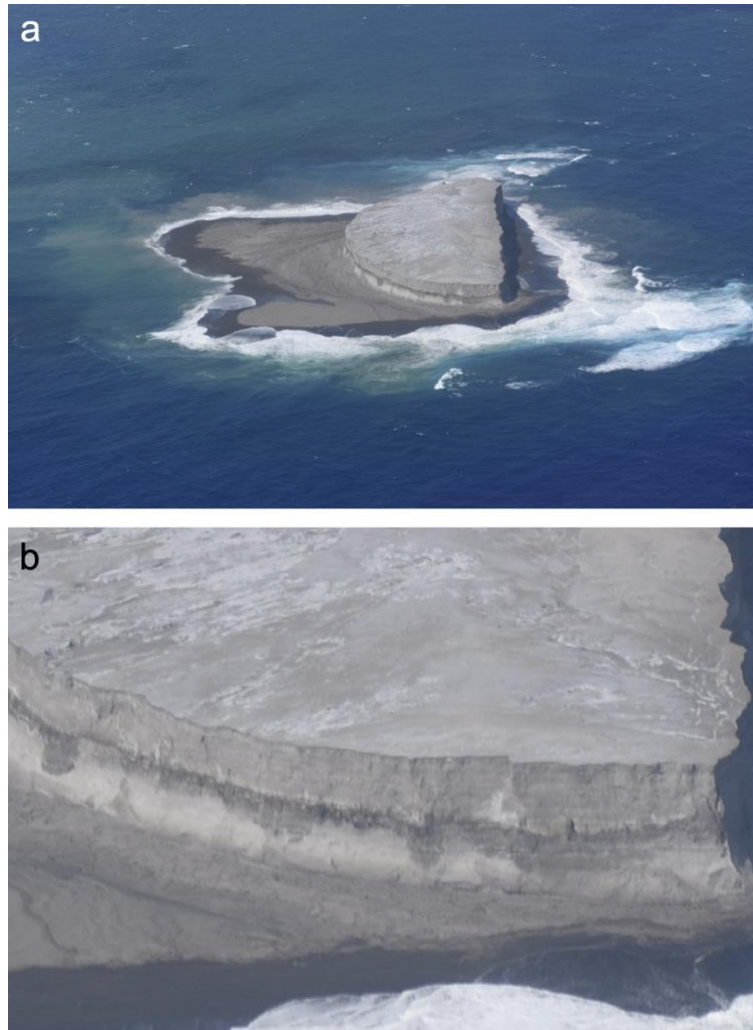

**Supplementary Figure 2 | Photos of a new islet of FOB.** **a**, The western islet produced by the 2021 FOB eruption, taken on 12 October by the Japan Coast Guard<sup>1</sup>. **b**, Magnification of the islet. The cone components are massive, poorly sorted, loose pyroclastic units. It appears to consist of two major layers.

**Supplementary Table 1 | Physical conditions and virtual input parameters to Plumeria**

| Physical parameters |        |          |       |        | Virtual parameters |             |                   |
|---------------------|--------|----------|-------|--------|--------------------|-------------|-------------------|
| $m_w^{ext}$         | $f_v$  | $T$ (°C) | $m_w$ | $x$    | $\hat{T}_m$ (°C)   | $\hat{n}_0$ | $\hat{m}_w^{ext}$ |
| 0.20                | 1.0000 | 225.2    |       | 0.1289 | 225                | 0.9000      | 0                 |
| 0.30                | 0.7420 | 100      |       | 0.1473 | 400                | 0.8503      | 0.3321            |
| 0.32                | 0.6689 | 100      |       | 0.1516 | 400                | 0.8393      | 0.3776            |
| 0.36                | 0.5451 | 100      | 0.9   | 0.1611 | 400                | 0.8166      | 0.4547            |
| 0.40                | 0.4442 | 100      |       | 0.1718 | 400                | 0.7927      | 0.5175            |
| 0.42                | 0.4005 | 100      |       | 0.1777 | 400                | 0.7803      | 0.5447            |
| 0.20                | 1.0000 | 225.2    |       | 0.0644 | 225                | 0.9500      | 0                 |
| 0.30                | 0.7420 | 100      |       | 0.0736 | 400                | 0.9236      | 0.3455            |
| 0.40                | 0.4442 | 100      | 0.95  | 0.0859 | 400                | 0.8910      | 0.5412            |
| 0.42                | 0.4005 | 100      |       | 0.0889 | 400                | 0.8837      | 0.5699            |
| 0.44                | 0.3605 | 100      |       | 0.0920 | 400                | 0.8762      | 0.5962            |
| 0.20                | 1.0000 | 225.2    |       | 0.2577 | 225                | 0.8000      | 0                 |
| 0.30                | 0.7420 | 100      |       | 0.2946 | 400                | 0.7121      | 0.3054            |
| 0.36                | 0.5451 | 100      | 0.8   | 0.3222 | 400                | 0.6585      | 0.4144            |
| 0.38                | 0.4922 | 100      |       | 0.3326 | 400                | 0.6405      | 0.4436            |
| 0.40                | 0.4442 | 100      |       | 0.3436 | 400                | 0.6225      | 0.4702            |
| 0.20                | 1.0000 | 225.2    |       | 0.3866 | 225                | 0.7000      | 0                 |
| 0.30                | 0.7420 | 100      |       | 0.4418 | 400                | 0.5841      | 0.2786            |
| 0.36                | 0.5451 | 100      | 0.7   | 0.4832 | 400                | 0.5207      | 0.374             |
| 0.38                | 0.4922 | 100      |       | 0.4988 | 400                | 0.5003      | 0.3996            |
| 0.20                | 1.0000 | 225.2    |       | 0.5155 | 225                | 0.6000      | 0                 |
| 0.30                | 0.7420 | 100      | 0.6   | 0.5891 | 400                | 0.4653      | 0.2519            |
| 0.36                | 0.5451 | 100      |       | 0.6443 | 400                | 0.3997      | 0.3337            |
| 0.20                | 1.0000 | 225.2    |       | 0.6443 | 225                | 0.5000      | 0                 |
| 0.30                | 0.7420 | 100      | 0.5   | 0.7364 | 400                | 0.3547      | 0.2252            |

$m_w^{ext}$ : mass fraction of external water added to the initial mixture;  $f_v$ : vapour phase mass fraction of H<sub>2</sub>O;  $T$ : temperature of initial mixture;  $m_w$ : water mass fraction of initial mixture;  $x$ : magma mass fraction in in plume;  $\hat{T}_m$ : virtual magma temperature;  $\hat{n}_0$ : virtual mass fraction of H<sub>2</sub>O in whole magma;  $\hat{m}_w^{ext}$ : virtual mass fraction of external water added to the initial mixture.

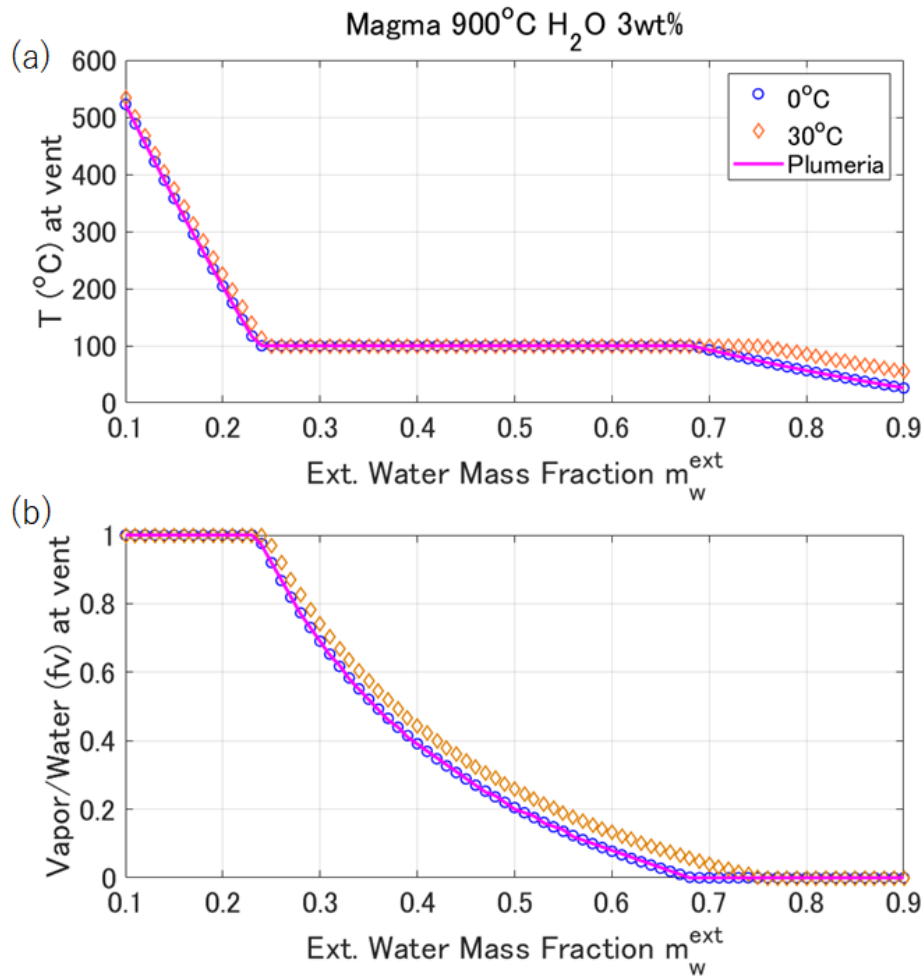

**Supplementary Figure 3 | The relation between the external mass fraction added to magma and the representative physical parameters at the vent.** (a) The relation between the external mass fraction added to magma ( $m_w^{ext}$ ) and the temperature ( $T$ ). (b) The relation between the external mass fraction added to magma ( $m_w^{ext}$ ) and the vapour mass fraction of total water in the plume ( $f_v$ ) at the vent. The blue circles are for the external water temperature of 0°C, consistent with the output values of Plumeria<sup>2,3</sup> (the magenta line). The orange diamonds represent the external water temperature of 30°C and are used in this study. See Supplementary Note 1 for details.

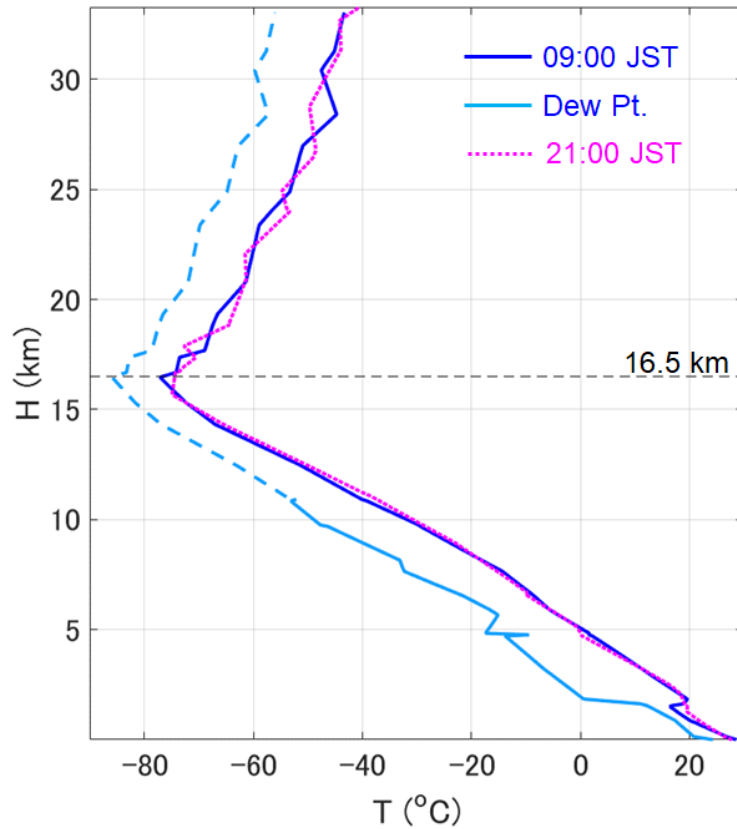

**Supplementary Figure 4 | Atmospheric structure at the 2021 FOB eruption.** The atmospheric temperature (blue line) and the dew point (light blue line) used in the plume calculation. The data were taken by the radiosonde at 09:00 JST on 13 August at the Japan Meteorology Agency, Chichijima Observatory. The dew points above 11.03 km (dashed line) were not from the data but were estimated by the Tetens equation<sup>4</sup>, assuming a humidity of 20%. The temperature measured at 21:00 JST on 13 August (magenta line) is displayed for comparison. See Supplementary Note 1 for the details.

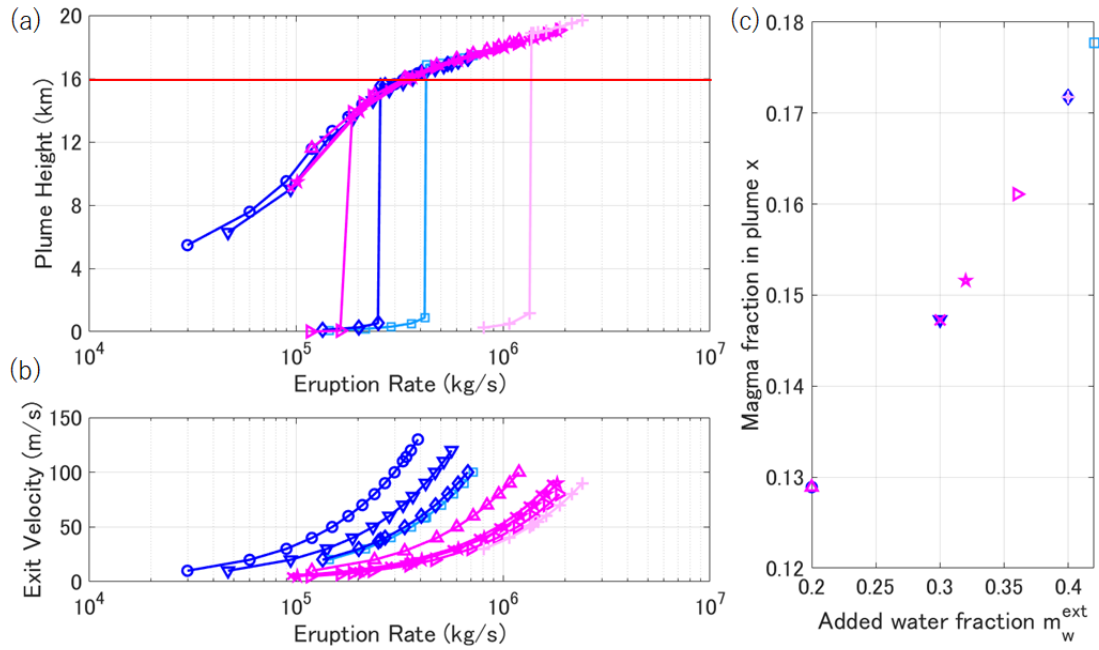

**Supplementary Figure 5 | The relation between the total magma discharge rate and the representative physical parameters obtained by Plumeria.** (a) The relation between the total magma discharge rate  $M_e$  and the plume height  $H_p$ , assuming a water mass fraction in plume ( $m_w$ ) of 0.9. The given exit velocities are shown in (b). The initial magma temperature is fixed at 900 and the added water fraction ( $m_w^{ext}$ ) is varied as in the horizontal axis of (c). The cases for exit diameters of 100 m and 200 m are shown by blue and magenta colors, respectively. The light-colored cases did not yield 16-km high plumes. The marker types are common among all of (a)-(c), indicating the values of  $m_w^{ext}$ . The plume height of 16 km is achieved with  $M_e$  of  $3 - 4 \times 10^5$  kg/s. See Supplementary Note 1 for the details.

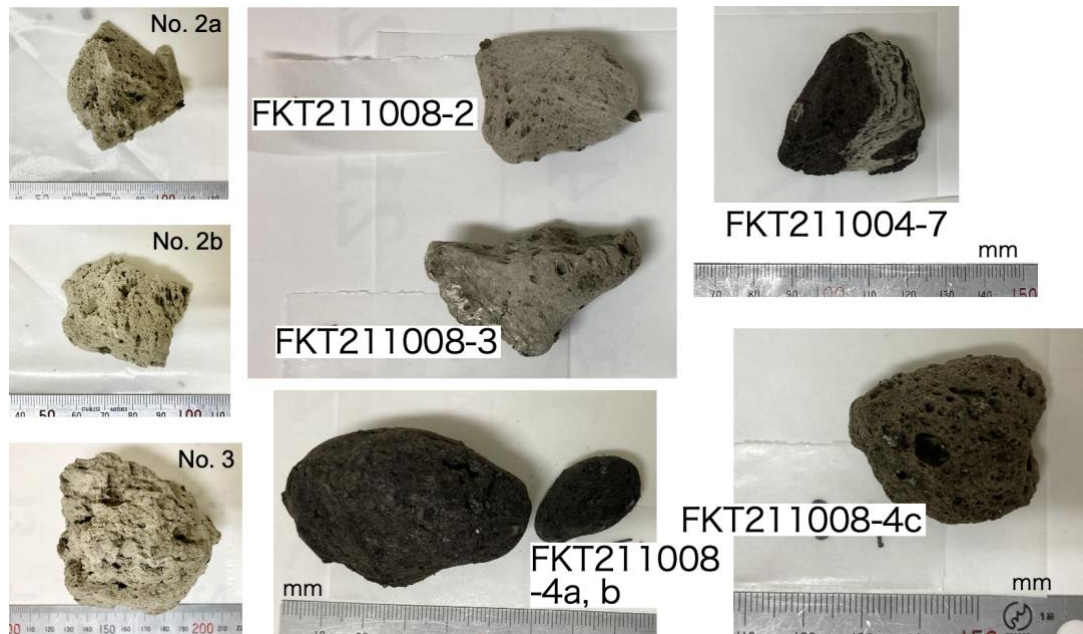

**Supplementary Figure 6 | Pumice samples from the 2021 FOB eruption used for whole-rock major element analyses.** Although textural and colour variations exist, whole-rock major element compositions are not varied (Supplementary Data 1). Most of the pumice clasts (more than 90%) are white-grey, as shown in No. 2a, 2b, and 3 and FKT211008-2 and 3. Black-coloured portions (FKT211004-7) and individual black pumice (FKT211008-4a, b, and c) are minorly present. The black colour has been interpreted as reflecting higher groundmass crystallinity due to nano-scale crystallization<sup>5</sup>.



## Supplementary Note 1 | Plume modelling

### 1. Introduction

The eruption of Fukutoku-Oka-no-ba (FOB) formed 16-km-high white plumes. We estimate the magma discharge rate required to create the 16-km-high plume. The essential feature of this eruption was the existence of a large amount of pumice that should have provided thermal energy to the plume but did not rise in the plume. We apply a user-friendly plume model, Plumeria<sup>3</sup> to calculate the relation between the eruption parameters and the plume height. To incorporate the thermal energy from pumice, we adjusted the input parameters of the software to represent the water-rich high-enthalpy mixture at the vent. Below we use ‘magma’ to describe the nonvolatile part of magma and ‘whole magma’ to represent magma, including magmatic H<sub>2</sub>O.

### 2. Method

#### 2.1 Adjusting the input parameters

The Plumeria model<sup>2</sup> assumes a homogeneous and equilibrium flow of mixtures consisting of magma, water (vapour, liquid, and ice), and entrained air. The software determines the mixture property at the vent (temperature  $T$ , H<sub>2</sub>O mass fraction  $m_w$ , and vapour phase mass fraction of H<sub>2</sub>O  $f_v$ ), calculating the enthalpy balance with the input parameters (whole magma temperature  $T_m$ , mass fraction of magmatic H<sub>2</sub>O in whole magma  $n_0$ , and mass fraction of external water added to the initial mixture  $m_w^{ext}$ ). The external water temperature is fixed at 0 °C. Then, using the mixture property and given vent diameter  $2r_0$  and exit velocity  $u_0$ , the total mass discharge rate  $M$  is determined. All the input material (magma and external water) is assumed to be ejected together so that the magma discharge rate is  $(1 - m_w)M$ .

To incorporate the thermal energy from the floating pumice, we independently calculate the enthalpy balance to obtain  $T$  and  $f_v$ , assuming  $T_m$  of 900 °C and  $n_0$  of 0.03. The amount of external water is varied in the range of  $0.1 < m_w^{ext} < 0.9$ . We have confirmed that our calculation yields equivalent values of  $T$  and  $f_v$  to Plumeria if the external water temperature is set at 0 °C (**Supplementary Fig. 3**). Then, the external water temperature is assumed to be 30 °C, which is realistic around the FOB in August. The obtained  $T$  and  $f_v$  are also shown in **Supplementary Fig. 3** as functions of  $m_w^{ext}$ .

The mass fraction of H<sub>2</sub>O with the above parameters is  $m_w^0 = m_w^{ext} + (1 - m_w^{ext})n_0$ . Then, we assume a new H<sub>2</sub>O mass fraction in the plume as  $m_w (> m_w^0)$ . Namely, only a

fraction  $x = (1 - m_w)/(1 - m_w^0)$  of magma goes into the plume. We calculate virtual magma temperature  $\hat{T}_m$ , mass fraction of H<sub>2</sub>O in whole magma  $\hat{n}_0$ , and external water at 0 °C added to the initial mixture  $\hat{m}_w^{ext}$  with which the Plumeria software has the specific mixture property at the vent  $(T, f_v, m_w)$ . Note that the values of  $(T, f_v, m_w)$  are essential for plume dynamics, and the assumed values  $(T_m, n_0, m_w^{ext})$  to obtain them are physical, while the virtual values  $(\hat{T}_m, \hat{n}_0, \hat{m}_w^{ext})$  are just technical for applying the Plumeria software to the current problem. When  $f_v = 1$ ,  $(\hat{T}_m, \hat{n}_0, \hat{m}_w^{ext}) = (T, m_w, 0)$ . When  $1 > f_v > 0$ ,  $T=100$  °C. Then, we assume  $\hat{T}_m=400$  °C and calculate the following equations:

$$\begin{aligned} (1 - \hat{m}_w^{ext})(1 - \hat{n}_0)h_m(\hat{T}_m) + (1 - \hat{m}_w^{ext})\hat{n}_0h_v(\hat{T}_m) + \hat{m}_w^{ext}h_l(\hat{T}_w) \\ = (1 - m_w)h_m(T) + m_w f_v h_v(T) + m_w(1 - f_v)h_l(T), \end{aligned} \quad (S1)$$

$$\hat{m}_w^{ext} + (1 - \hat{m}_w^{ext})\hat{n}_0 = m_w, \quad (S2)$$

where  $h_m$ ,  $h_v$ , and  $h_l$  are the enthalpy of a unit mass of magma, water vapour, and liquid water, respectively, and  $\hat{T}_w$  is the external water temperature in Plumeria, which is 0 °C.

For the total mass discharge rate,  $M$ , evaluated by Plumeria,  $(1 - m_w)M$  represents the magma mass discharge rate in the plume. Then, the erupted magma discharge rate  $M_e$ , including the floating pumice, is

$$M_e = (1 - m_w)M/x = (1 - m_w^0)M. \quad (S3)$$

## 2. 2 Atmospheric structure

The atmospheric data are measured by radiosonde, twice a day (at 09:00 and 21:00 JST) at Chichijima, 330 km to the north of FOB. We downloaded them from the University of Wyoming website (<http://weather.uwyo.edu/upperair/sounding.html>). The Plumeria uses the pressure, temperature, and dew point as functions of height. In the upper layers where dew point data were missing, we assumed a humidity of 20% and calculated the dew point using the following Tetens equation<sup>4</sup> extended below 0 °C:

$$P_v = 610.78 \exp\left(\frac{21.875T_d}{T_d + 265.5}\right), \quad (S4)$$

where  $P_v$  is the vapour pressure in Pa and  $T_d$  is the dew temperature in °C. **Supplementary Fig. 4** shows the atmospheric structure used with Plumeria. It shows a thin tropopause at 16.5 km high.

## 3. Results

We run the Plumeria for the input properties listed in **Supplementary Table 1**. Using the results of the Plumeria calculation for the mass discharge rate  $M$  and plume height  $H_p$ , we obtain the relation between the total eruption rate  $M_e$  in Eq. (S3) and  $H_p$ .

**Supplementary Fig. 5** shows the relation for the water mass fraction in the plume of 0.9, assuming exit diameters of 100 m (blue) and 200 m (magenta). The  $M_e - H_p$  relations are nearly identical when the plume heights reach 16 km. Regardless of the added water fractions to magma ( $m_w^{ext}$ ) or the diameters, 16-km high plumes are formed with  $M_e$  of  $3 - 4 \times 10^5$  kg/s. The exit velocities that give these results are smaller than 100 m/s, which is reasonable. When too much water is added ( $m_w^{ext} > 0.4$ ), the plume becomes too high or collapses.

In **Fig. 4** in the main text, we vary the water mass fraction in the plume from 0.5 to 0.95, fixing the exit diameter at 100 m. In the range of the parameters, we obtain 16-km high plumes with an eruption rate  $M_e$  of  $3 - 6 \times 10^5$  kg/s.

The above results have constrained that the water-rich 16-km-high plume of the FOB is formed by an eruption rate of  $3 - 6 \times 10^5$  kg/s. Assuming a nine-hour sustained plume, the erupted mass is estimated to be  $1 - 2 \times 10^{10}$  kg. We regard these values as the lower limit, considering it accounts for only the magma that is thermally in equilibrium with the water at the vent.

## Supplementary References

1. Hydrographic and Oceanographic Department, Japan Coast Guard. <https://www1.kaiho.mlit.go.jp/GIJUTSUKOKUSAI/kaiikiDB/kaiyo24-2.htm>, accessed on 29 November 2021.
2. Mastin, L.G., A user-friendly one-dimensional model for wet volcanic plumes. *Geochemistry, Geophysics, Geosystems* **8**, Q03014. doi:10.1029/2006GC001455 (2007).
3. Mastin, L.G., "Plumeria 2.3.1," <https://vhub.org/resources/1194> (2011).
4. Murray, F.W. On the computation of saturation vapour pressure. *J. Applied Meteorology* **6**, 203-204 (1967).
5. Yoshida, K., et al. Variety of the drift pumice clasts from the 2021 Fukutoku-Oka-no-Ba eruption, Japan. *Island Arc*, **31**, e12441 (2022).
