# Supplementary material for: Seawater-magma interactions sustained the high column during the 2021 phreatomagmatic eruption of Fukutoku-Oka-no-Ba
Source: Springer Nature journal article supplement (doi:10.1038/s43247-022-00594-4), 2022-11-01
Supplement: 43247_2022_594_MOESM5_ESM.pdf [file 43247_2022_594_MOESM5_ESM.pdf]

## Description of Additional Supplementary Files

**File name:** Supplementary Data 1

**Description:** Whole-rock major and trace element compositions of the representative samples from the 2021 FOB eruption.

**File name:** Supplementary Data 2

**Description:** Glass chemical compositions of groundmass glass and melt inclusions of the 2021 FOB products.
